# Supplementary material for: Synthesis of morphology controlled PtAu@Ag nanorings through concentric and eccentric growth pathways
Source: Royal Society of Chemistry journal article supplement (doi:10.1039/d1cc04026j), 2021-01-01
Supplement: d1cc04026j1.pdf [file d1cc04026j1.pdf]

Supporting information for

# Synthesis of Morphology Controlled PtAu@Ag Nanorings through Concentric and Eccentric Growth Pathways

*Junghwa Lee<sup>a†</sup>, Sungwoo Lee<sup>a†</sup>, Jeongwon Kim<sup>a</sup>, Sungjae Yoo<sup>a</sup>, Soohyun Lee<sup>a</sup>,*

*Jiwoong Son<sup>b</sup>, Hajir Hilal<sup>a</sup>, Sungeun Go<sup>a</sup>, Jaewon Lee<sup>a</sup>, Jwa-Min Nam<sup>b</sup>,*

*and Sungho Park<sup>a\*</sup>*

<sup>a</sup>Department of Chemistry, Sungkyunkwan University, Suwon, 16419, South Korea

<sup>b</sup>Department of Chemistry, Seoul National University, Seoul, 08826, South Korea

\*Email: spark72@skku.edu

## Table of Contents:

|                                                                                                                                                                                      |    |
|--------------------------------------------------------------------------------------------------------------------------------------------------------------------------------------|----|
| Experimental details.....                                                                                                                                                            | 3  |
| Figure S1. Schematic illustration representing synthetic procedure of concentric PtAu@Ag nanorings and eccentric PtAu@Ag nanorings.....                                              | 5  |
| Figure S2. FE-SEM images of triangular Au nanoplates, circular Au nanoplates, Au@Pt nanodisks, and PtAu nanorings.....                                                               | 6  |
| Figure S3. Atomic fraction (Ag, Pt, and Au) data of a concentric PtAu@Ag nanoring and an eccentric PtAu@Ag nanoring obtained from energy-dispersive spectroscopy (EDS) analysis..... | 7  |
| Figure S4. UV-vis-NIR spectrum of PtAu nanorings.....                                                                                                                                | 8  |
| Figure S5. Theoretical simulation data of concentric PtAu@Ag nanorings and eccentric PtAu@Ag nanorings.....                                                                          | 9  |
| Figure S6. Schematic illustration representing methodology of fabricating 2D monolayer of Au and Ag nanorings.....                                                                   | 10 |
| Figure S7. FE-SEM images of monolayer of Ag nanorings.....                                                                                                                           | 11 |
| References.....                                                                                                                                                                      | 12 |

## Experimental details

### Chemicals and materials

We purchased trisodium citrate dihydrate, sodium iodide ( $\geq 99.5\%$ ), hexadecyltrimethylammonium bromide (CTAB,  $\geq 98\%$ ), L-ascorbic acid (99%), and 2-naphthalenethiol (99%) from Sigma-Aldrich. We purchased hydrogen tetrachloroaurate(III) hydrate ( $\text{HAuCl}_4 \cdot n\text{H}_2\text{O}$ , 99%), hydrogen hexachloroplatinate(IV) hydrate ( $\text{H}_2\text{PtCl}_6 \cdot n\text{H}_2\text{O}$ , 99%), and silver nitrate ( $\text{AgNO}_3$ , 99.9%) from Kojima, Japan. We purchased sodium borohydride ( $\text{NaBH}_4$ , 98.0%) from Junsei, Japan. We purchased hydrochloric acid ( $\text{HCl}$ , 35%) and sodium hydroxide ( $\text{NaOH}$ , 98.0%) from Samchun, Korea. We purchased hexadecyltrimethylammonium chloride (CTAC,  $>95.0\%$ ) from Tokyo Chemical Industry, Japan. All reagents were dissolved in triply deionized water ( $\geq 18.2 \text{ M}\Omega$ ) prepared by Milli-Q (from Millipore).

### Synthesis of concentric PtAu@Ag nanorings

First, we prepared PtAu nanorings by following the experimental procedure in previously reported literatures.<sup>1</sup> We synthesized concentric PtAu@Ag nanorings by mixing 250  $\mu\text{L}$  of Pt nanorings with 500  $\mu\text{L}$  of 0.1 M CTAC, 0.2 mM  $\text{AgNO}_3$  (100  $\mu\text{L}$ , 200  $\mu\text{L}$ , and 300  $\mu\text{L}$ ), 40  $\mu\text{L}$  of 0.01 M ascorbic acid, and 20  $\mu\text{L}$  of 0.05 M sodium hydroxide. After the reaction at 30  $^\circ\text{C}$  for 30 min, we washed the resulting solution with triply deionized water twice via centrifugation. The geometrical parameters of concentric PtAu@Ag nanorings was tuned by controlling the volume of 0.2 mM  $\text{AgNO}_3$ .

### **Synthesis of eccentric PtAu@Ag nanorings**

We synthesized eccentric PtAu@Ag nanorings by mixing 250  $\mu\text{L}$  of PtAu nanorings with 500  $\mu\text{L}$  of 0.1 M CTAB, 0.2 mM  $\text{AgNO}_3$  (40  $\mu\text{L}$ , 60  $\mu\text{L}$ , and 80  $\mu\text{L}$ ), 200  $\mu\text{L}$  of 0.01 M ascorbic acid, and 200  $\mu\text{L}$  of 0.05 M sodium hydroxide. After the reaction at 30  $^\circ\text{C}$  for 30 min, we washed the resulting solution with triply deionized water twice via centrifugation. The geometrical parameters of eccentric PtAu@Ag nanorings was tuned by controlling the volume of 0.2 mM  $\text{AgNO}_3$ .

### **Synthesis of PtAu@Au nanorings**

We synthesized PtAu@Au nanorings by mixing 250  $\mu\text{L}$  of PtAu nanorings with 200  $\mu\text{L}$  of 0.05 M CTAB, 2 mM  $\text{HAuCl}_4$  (20  $\mu\text{L}$ , 30  $\mu\text{L}$ , and 40  $\mu\text{L}$ ), 200  $\mu\text{L}$  of 0.1 M ascorbic acid, and 20  $\mu\text{L}$  of 0.1 M hydrochloric acid in the presence of iodide ion (50  $\mu\text{M}$ ). After the reaction at 30  $^\circ\text{C}$  for 30 min, we washed the resulting solution with triply deionized water twice via centrifugation. The geometrical parameters PtAu@Au nanorings was tuned by controlling the volume of 2 mM  $\text{HAuCl}_4$ .

### **Fabrication of the 2D monolayer of nanorings**

We fabricated 2D monolayer of nanorings by Langmuir-Blodgett (LB) method.<sup>2</sup> We transferred 10 mL of nanoring solution into a Teflon bath, and added 2 mL of hexane at the top surface of nanoring solution to form a hexane-water interface. Then, we added 5 mL of ethanol dropwise at a rate of 30 mL/h. After ethanol transported nanorings from the aqueous solution to the hexane-water interface, hexane at the top surface of nanoring solution was evaporated. We collected a 2D monolayer of nanorings on the silicon wafer for FE-SEM and

surface-enhanced Raman spectroscopy (SERS) measurement.

## Instrumentation

We obtained images of nanoparticles using Field-emission scanning electron microscopy (JSM-7100F, JEOL) and high-resolution transmission electron microscopy (JEM-ARM 200F-JEOL). We obtained ensemble SERS signals using confocal Raman microscopy (WiTec alpha 300R) equipped with a 633 nm He-Ne laser.

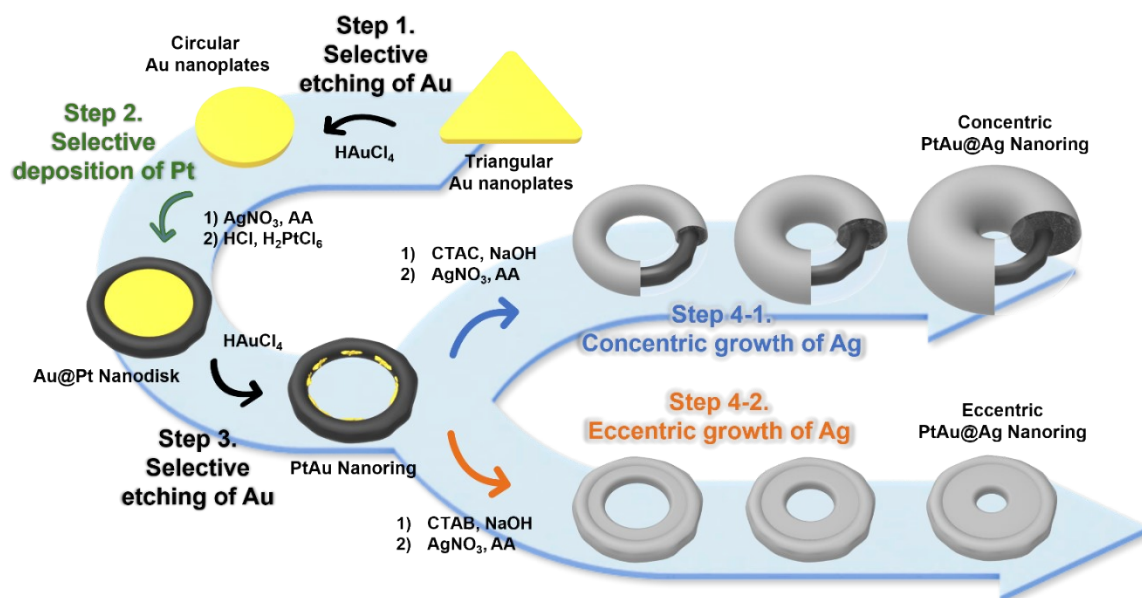

**Figure S1. Schematic illustration representing synthetic procedure of concentric PtAu@Ag nanorings and eccentric PtAu@Ag nanorings.** The multistep synthetic procedure for synthesizing PtAu@Ag nanorings included selective etching of Au, selective deposition of Pt, selective etching of Au, eccentric growth of Ag, and concentric growth of Ag.

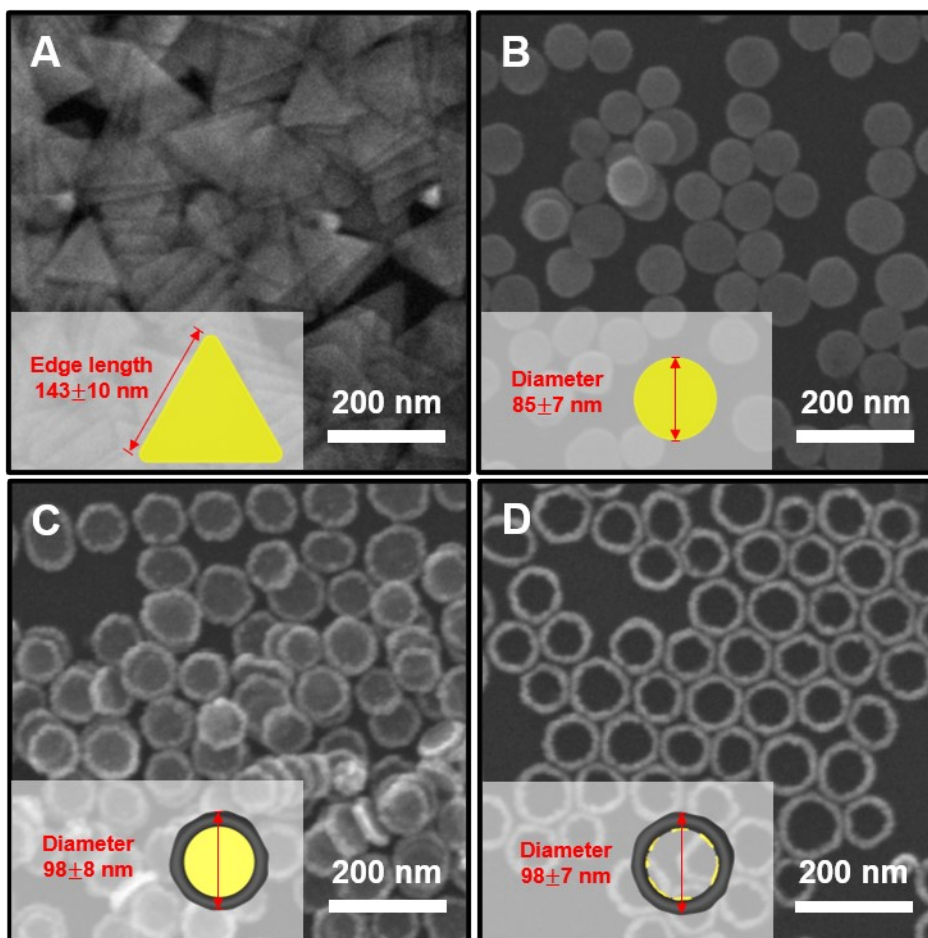

**Figure S2. FE-SEM images of triangular Au nanoplates, circular Au nanoplates, Au@Pt nanodisks, and PtAu nanorings. (A-D) FE-SEM images of triangular Au nanoplates, circular Au nanoplates, Au@Pt nanodisks, and PtAu nanorings, respectively.**

**A**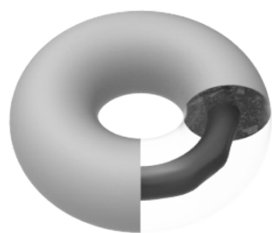

**Concentric  
PtAu@Ag nanoring**

| Element | Atomic % |
|---------|----------|
| Ag      | 91.49 %  |
| Pt      | 6.07 %   |
| Au      | 2.44 %   |
| Total   | 100 %    |

**B**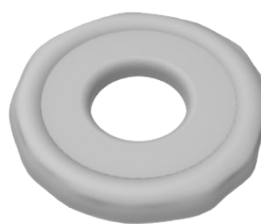

**Eccentric  
PtAu@Ag nanoring**

| Element | Atomic % |
|---------|----------|
| Ag      | 84.37 %  |
| Pt      | 9.99 %   |
| Au      | 5.64 %   |
| Total   | 100 %    |

**Figure S3. Atomic fraction (Ag, Pt, and Au) data of a concentric PtAu@Ag nanoring and an eccentric PtAu@Ag nanoring obtained from energy-dispersive spectroscopy (EDS) analysis. (A) atomic fractions of Ag, Pt, and Au of a concentric PtAu@Ag nanoring were 91.49 %, 6.07 %, and 2.44 %, respectively. (B) atomic fraction of Ag, Pt, and Au of an eccentric PtAu@Ag nanoring were 84.37 %, 9.99 %, and 5.64 %, respectively.**

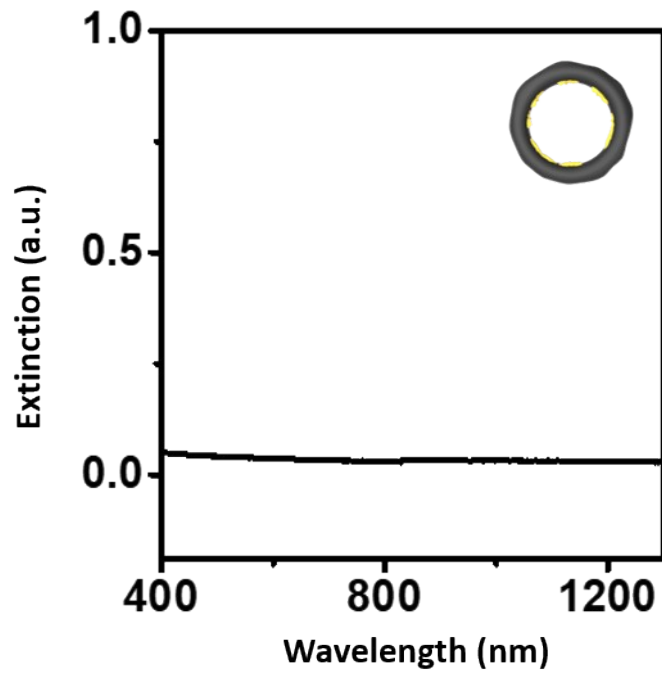

**Figure S4. UV-vis-NIR spectrum of PtAu nanorings.** UV-vis-NIR spectrum of PtAu nanorings showed no spectroscopic features.



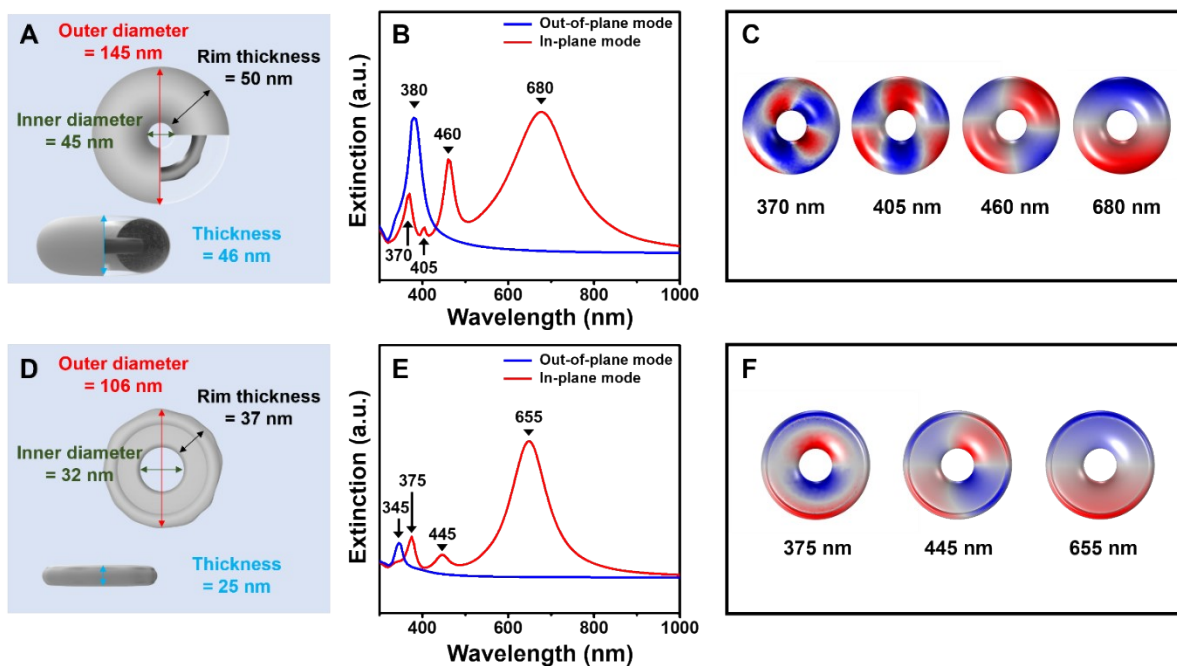

**Figure S5. Theoretical simulation data of concentric PtAu@Ag nanorings and eccentric PtAu@Ag nanorings.** Physical dimension utilized for theoretical simulation, theoretically simulated extinction spectra, and corresponding charge distribution analysis data of (respectively A, B, C) concentric PtAu@Ag nanorings and (respectively D, E, F) eccentric PtAu@Ag nanorings under the in-plane and the out-of-plane polarized wave.

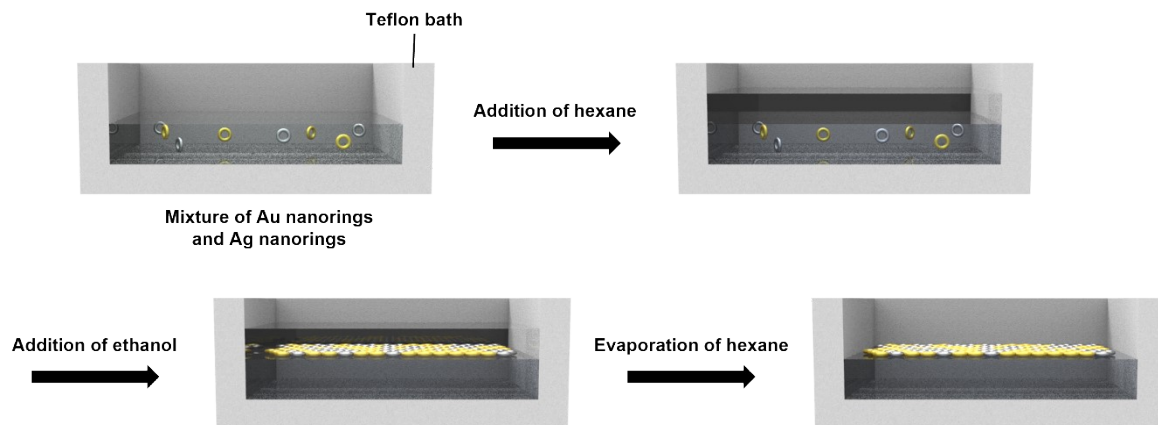

**Figure S6. Schematic illustration representing methodology of fabricating 2D monolayer of Au and Ag nanorings.** To fabricate 2D monolayer of nanorings, we added hexane on top of the mixture solution of Au and Ag nanorings. Then, we added ethanol to the water-hexane solution, which resulted in formation nanoring-monomer assembly at the water-oil interface. After hexane evaporation, we collected 2D monolayer film of nanorings on the silicon wafer.

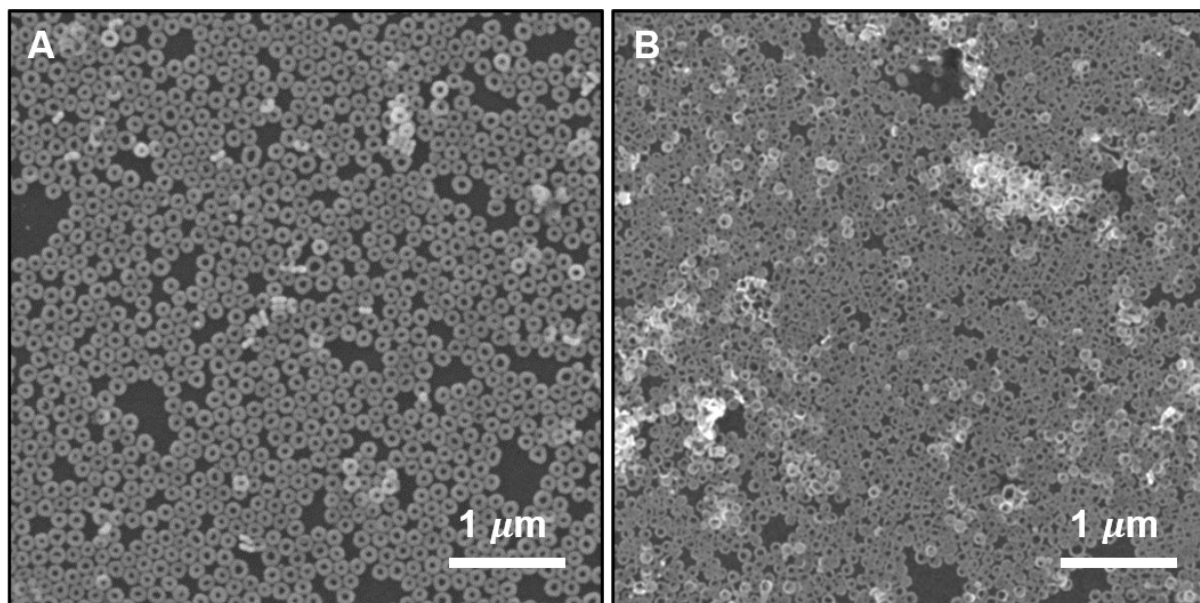

**Figure S7. FE-SEM images of monolayer of Ag nanorings.** FE-SEM images of monolayer of (A) concentric PtAu@Ag nanorings and (B) eccentric PtAu@Ag nanorings.

## References

1. H. J. Jang, S. Ham, J. A. I. Acapulco, Y. Song, S. Hong, K. L. Shuford and S. Park, *J Am Chem Soc*, 2014, **136**, 17674-17680.
2. S. Yun, S. Hong, J. A. I. Acapulco, H. Y. Jang, S. Ham, K. Lee, S. K. Kim and S. Park, *Chem-Eur J*, 2015, **21**, 6165-6172.
